# Supplementary figures and images for: Effect of CRTH2 antagonism on the response to experimental rhinovirus infection in asthma: a pilot randomised controlled trial
Source: HighWire-hosted journal article supplement (doi:10.1136/thoraxjnl-2021-217429), 2021-10-29

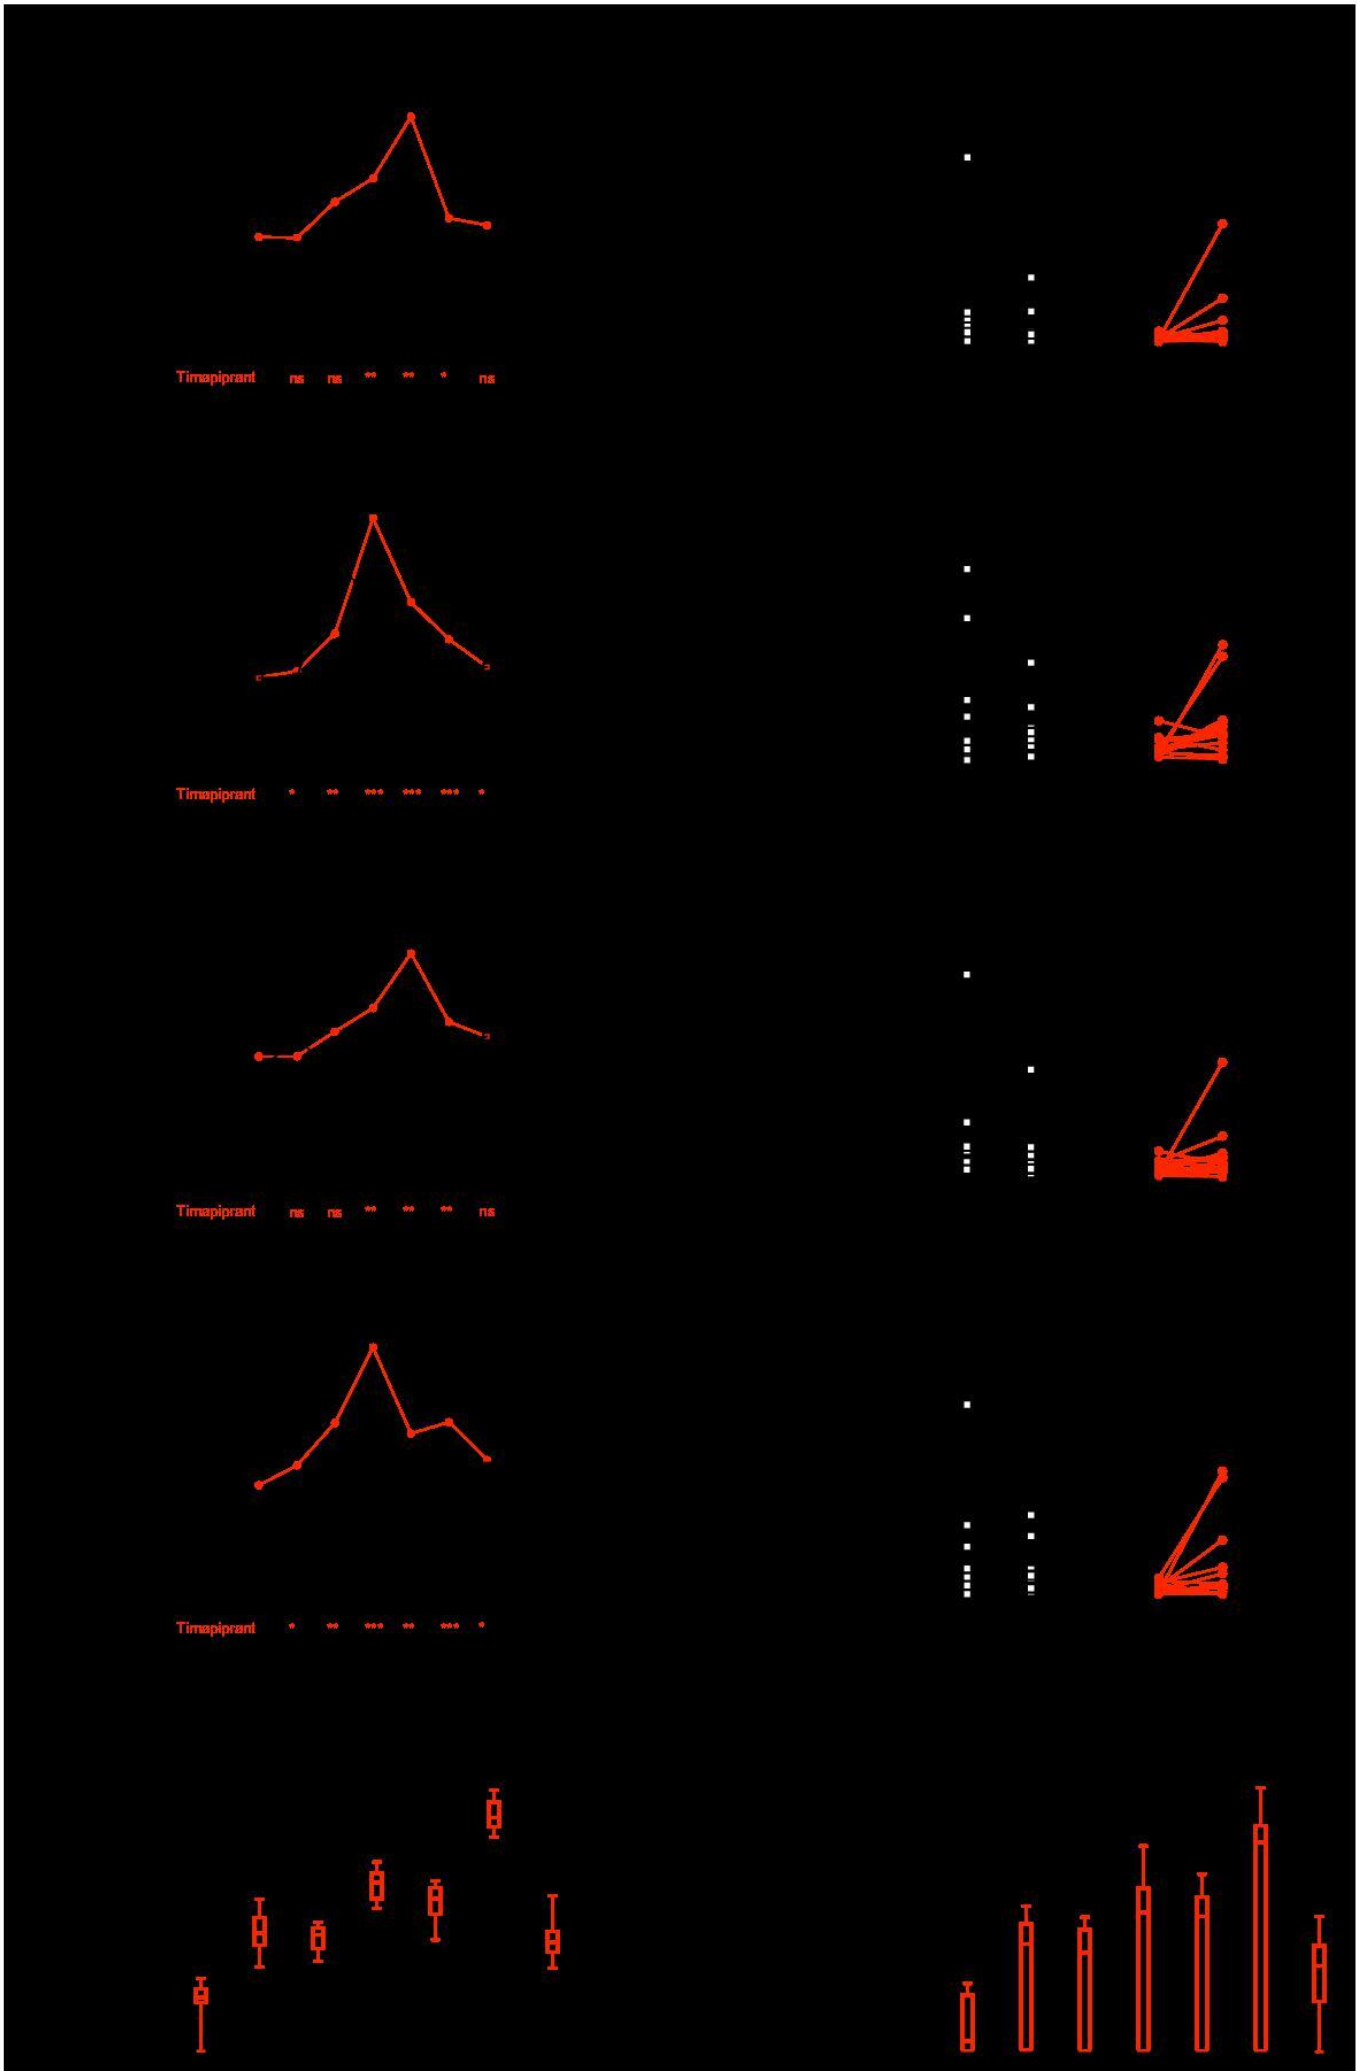

Supplement: thoraxjnl-2021-217429supp002_data_supplement.pdf [file thoraxjnl-2021-217429supp002_data_supplement.pdf]

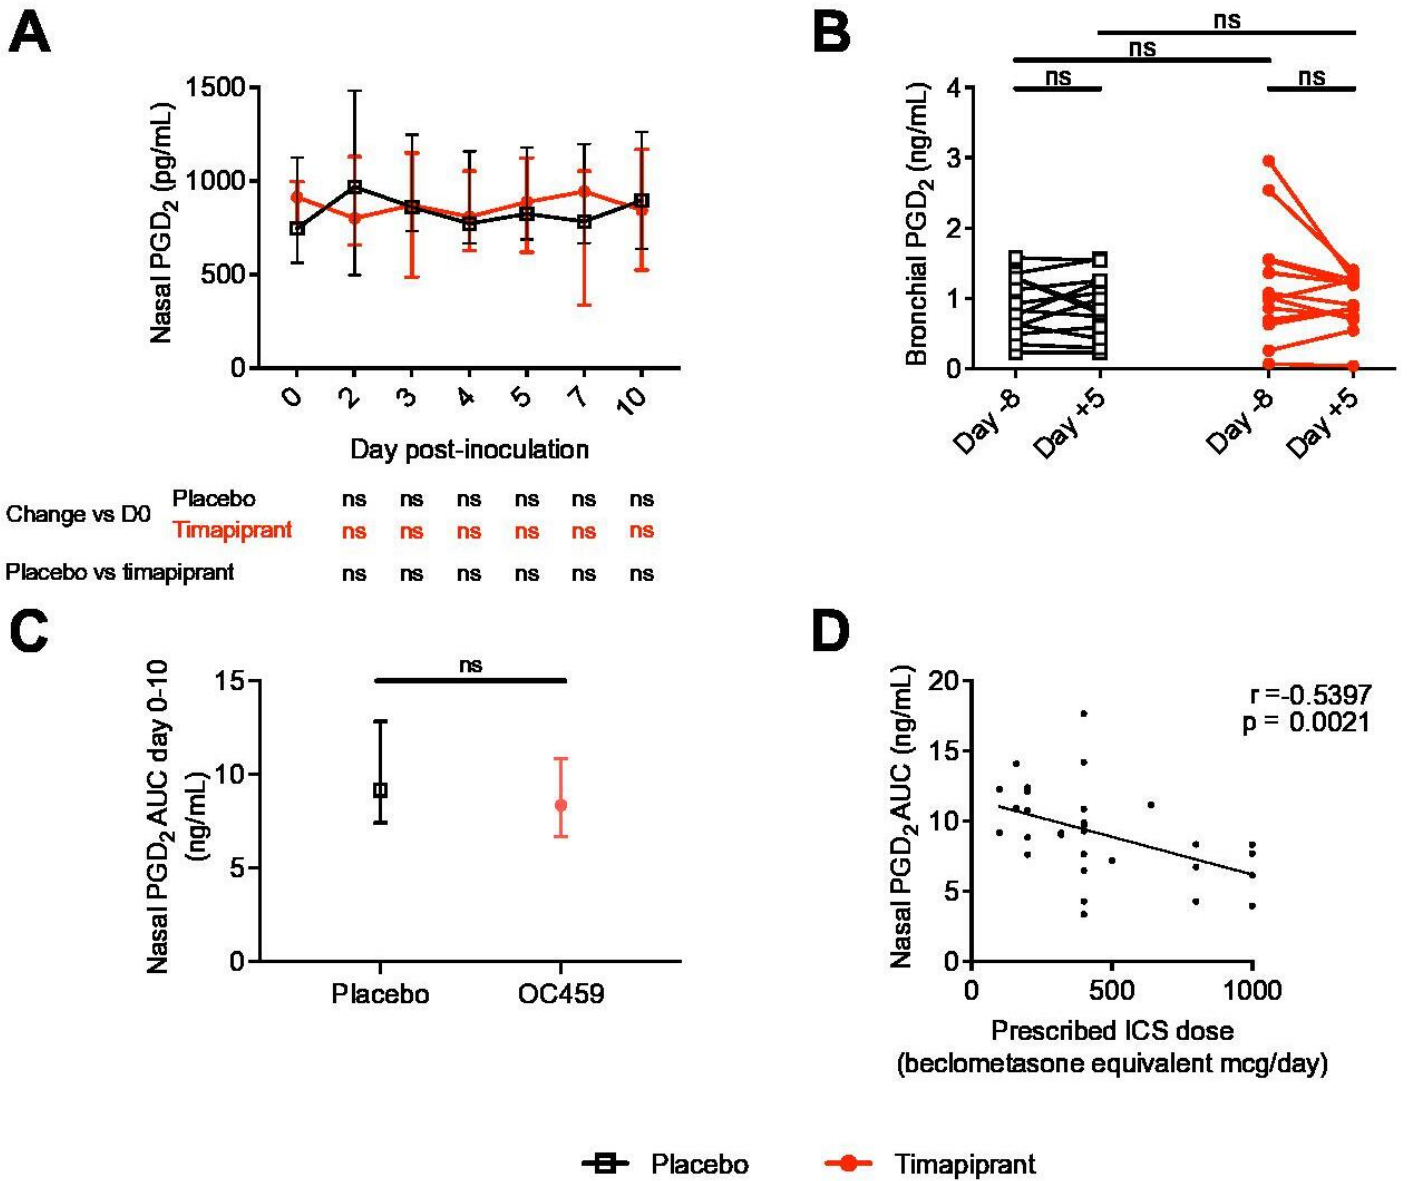

Supplement: thoraxjnl-2021-217429supp003_data_supplement.pdf [file thoraxjnl-2021-217429supp003_data_supplement.pdf]

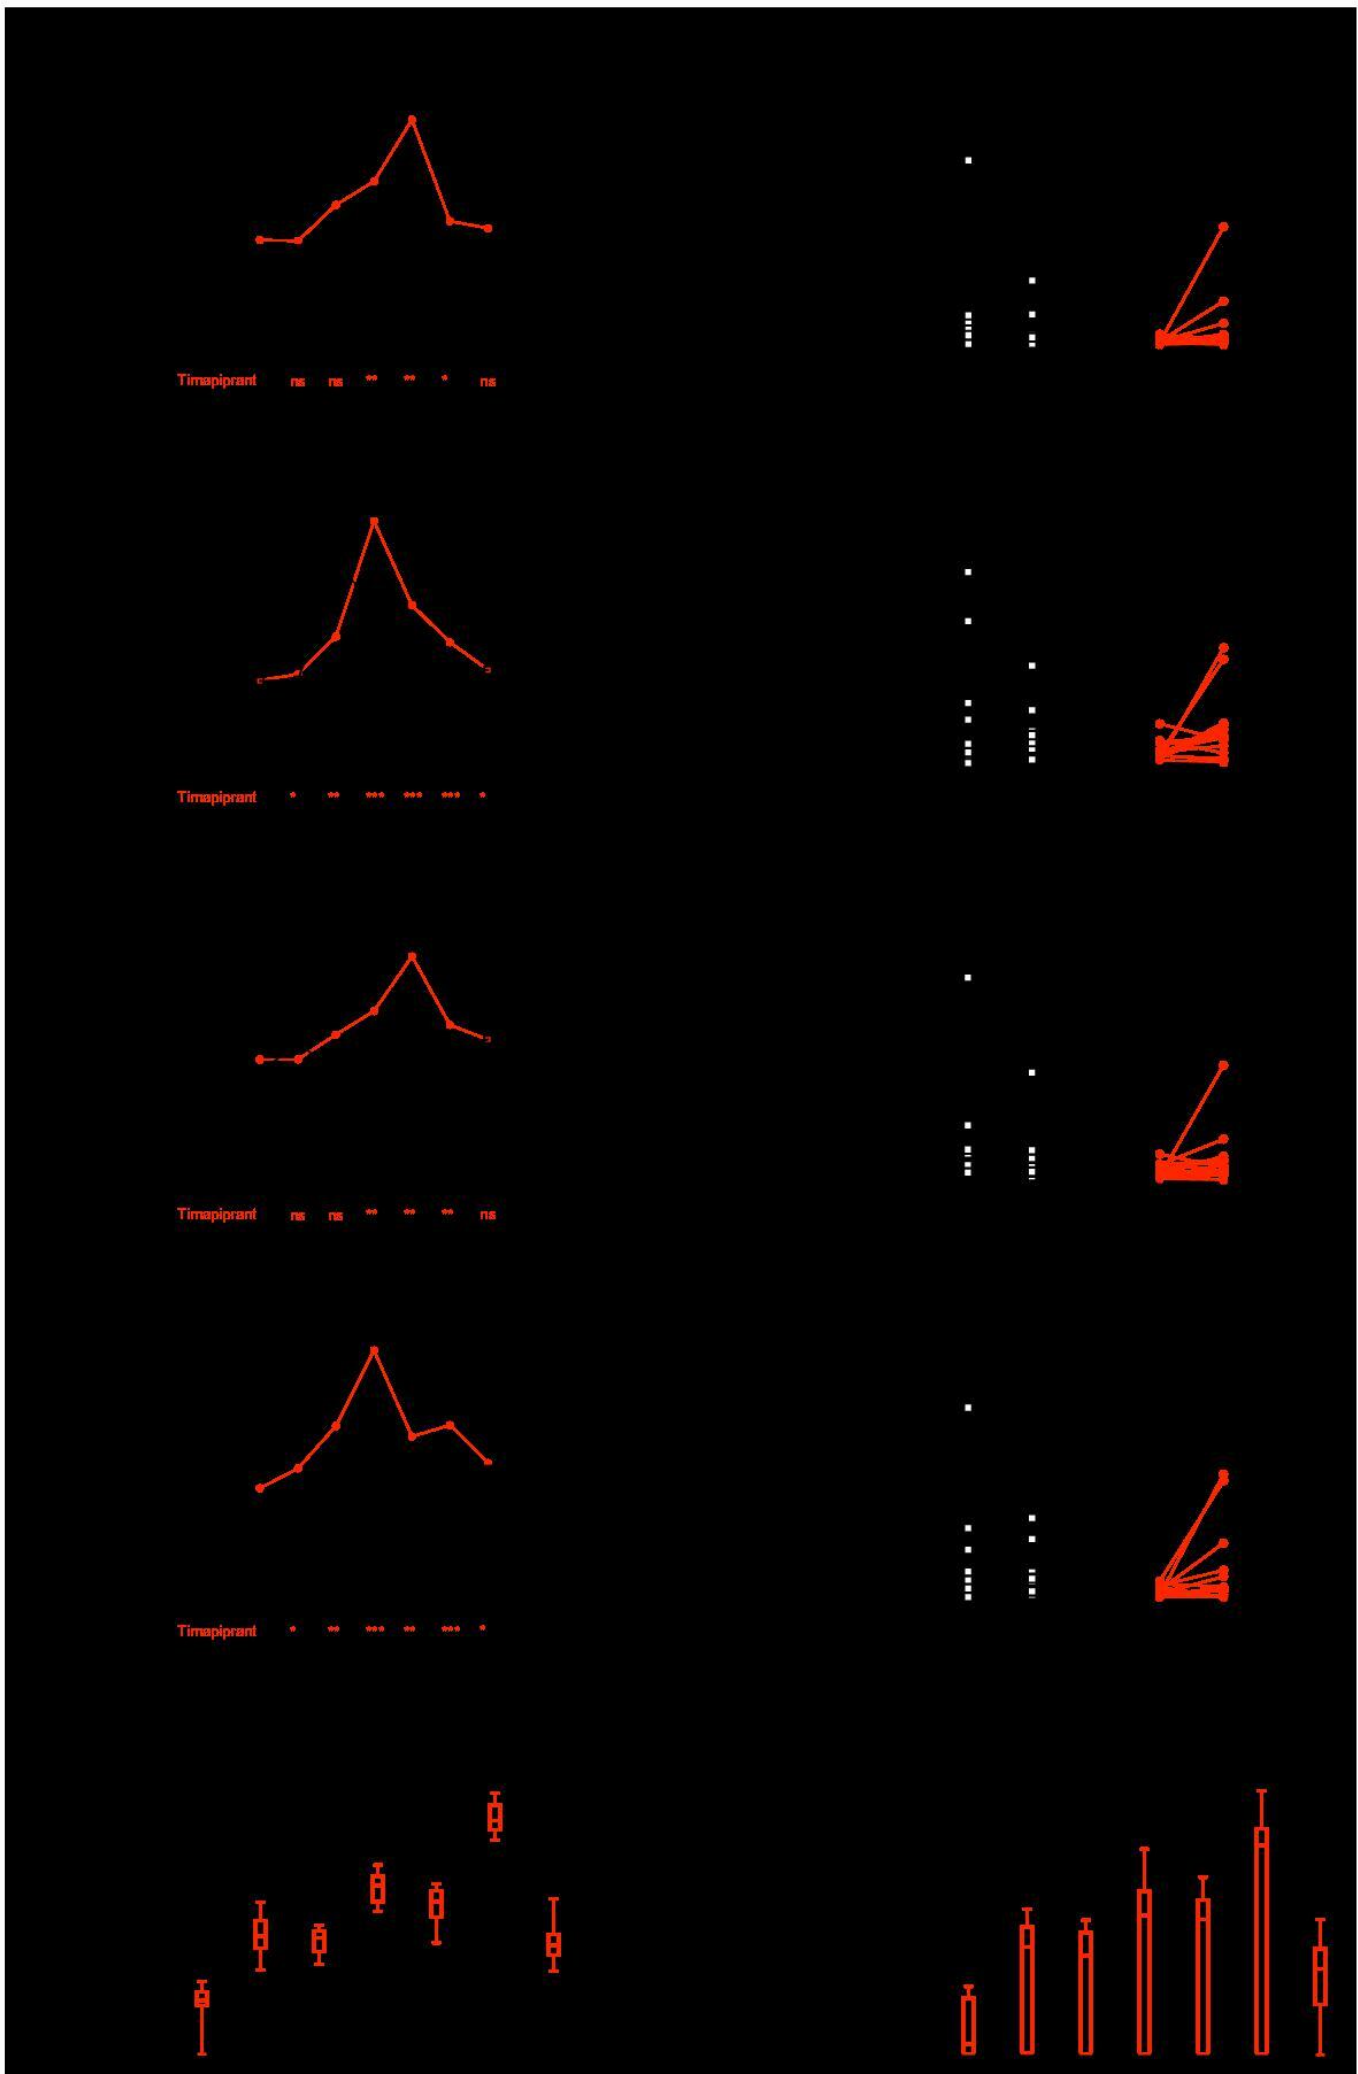

Supplement: thoraxjnl-2021-217429supp002_data_supplement.pdf [file thoraxjnl-2021-217429supp002_data_supplement.pdf]



Supplement: thoraxjnl-2021-217429supp003_data_supplement.pdf [file thoraxjnl-2021-217429supp003_data_supplement.pdf]
